# Supplementary material for: Optimization and characterization of miRNA-129-5p-encapsulated poly (lactic-co-glycolic acid) nanoparticles to reprogram activated microglia
Source: Royal Society of Chemistry journal article supplement (doi:10.1039/d3na00149k), 2023-01-01
Supplement: d3na00149k1.pdf [file d3na00149k1.pdf]

Electronic Supporting Information

**Optimization and characterization of miRNA-129-5p-encapsulated poly (lactic-co-glycolic acid) nanoparticle to reprogram activated microglia**

*Irina Kalashnikova<sup>1</sup>, Heather Cambell<sup>1</sup>, Daniel Kolpek<sup>1</sup> and Jonghyuck Park<sup>1,2\*</sup>.*

*<sup>1</sup>Department of Pharmaceutical Sciences, College of Pharmacy, University of Kentucky, Lexington, KY, USA*

*<sup>2</sup>Spinal Cord and Brain Injury Research Center, College of Medicine, University of Kentucky, Lexington, KY, USA*

*\*Corresponding Author: [jonghyuck.park@uky.edu](mailto:jonghyuck.park@uky.edu)*

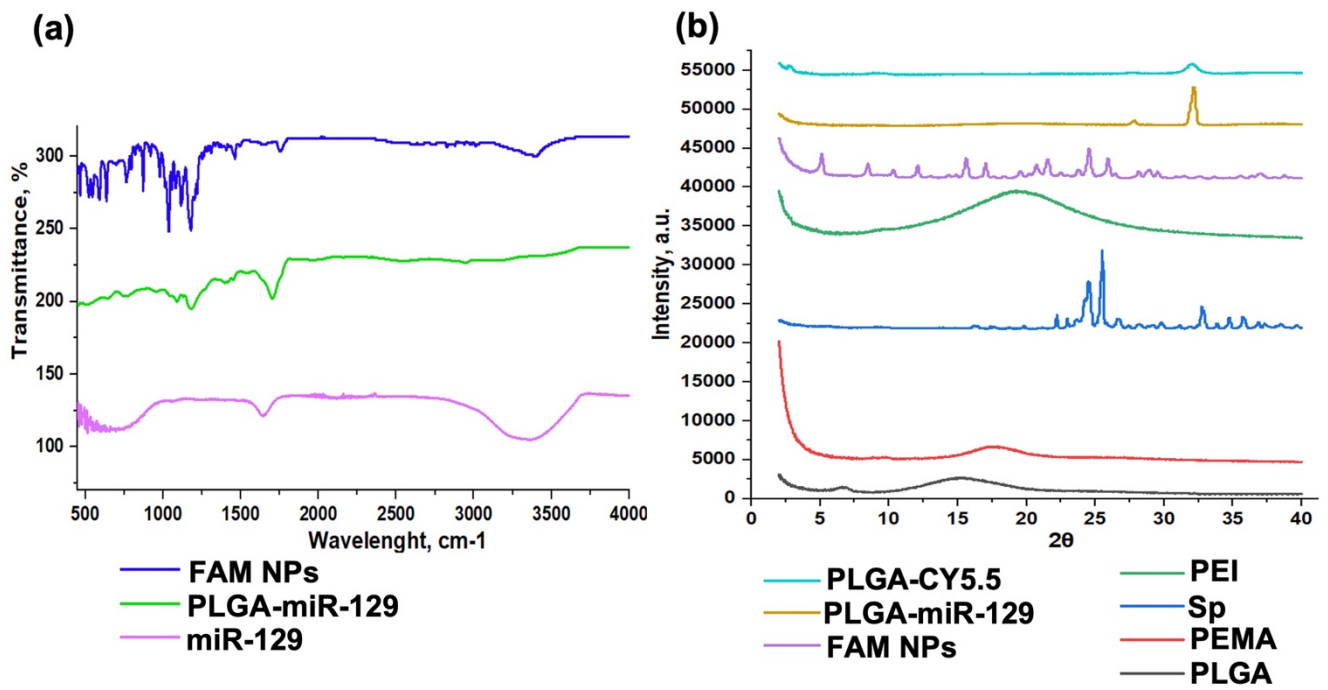

**Fig S1.** Nanoformulation characterization by FTIR **(a)** and X-ray diffraction patterns **(b)**.

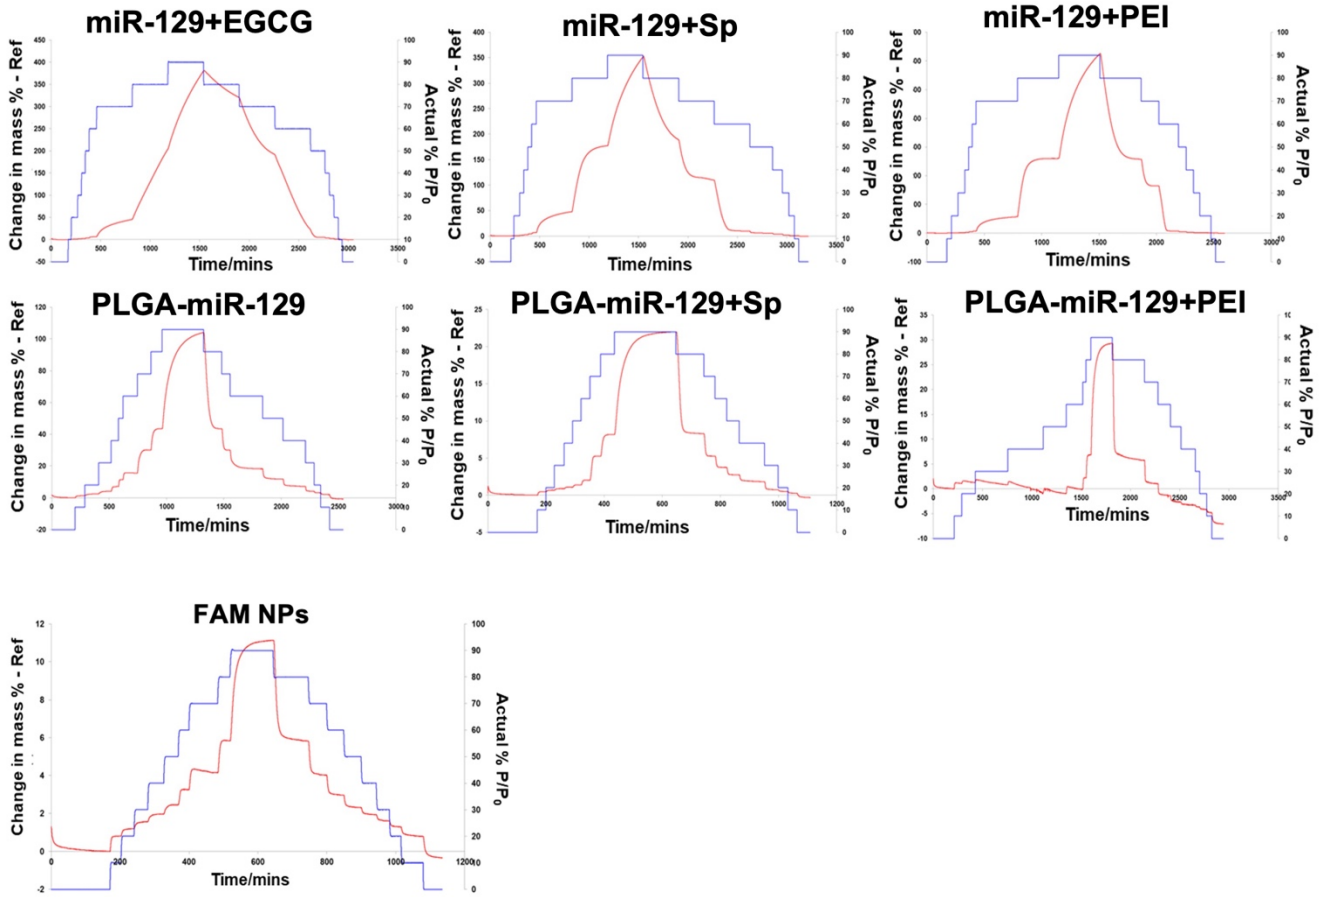

**Fig S2.** Dynamic vapor sorption analysis results. Water adsorption/desorption kinetics (blue line: %P/P<sub>0</sub>, red line: mass change).

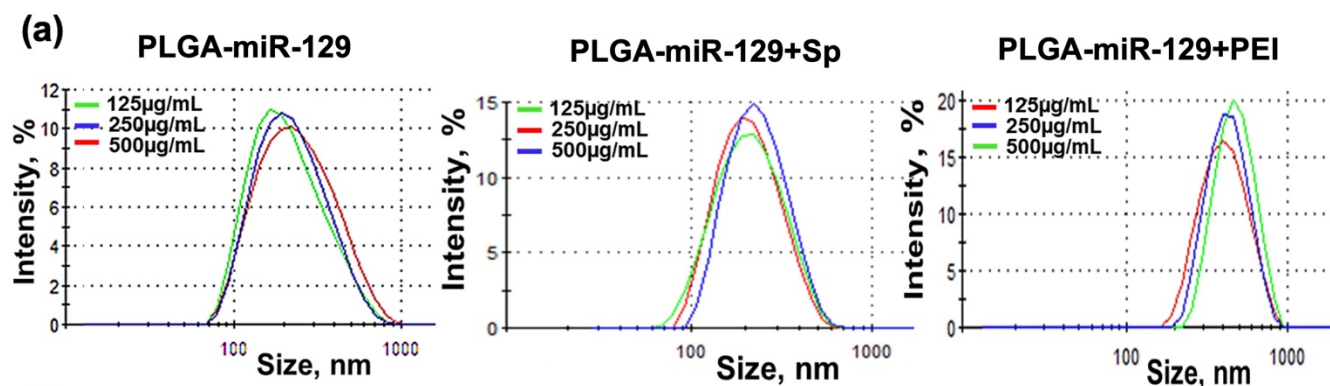

**(b)**

| NPs name         | miRNA loading, µg | Size, nm   | Pdl       | Zeta potential, mV |
|------------------|-------------------|------------|-----------|--------------------|
| PLGA-miR-129     | 125               | 309.3±8.5  | 0.23±0.03 | -28.6±0.3          |
|                  | 250               | 315.2±9.2  | 0.27±0.02 | -28.8±0.5          |
|                  | 500               | 330.9±11.1 | 0.26±0.07 | -29.2±1.5          |
| PLGA-miR-129+Sp  | 125               | 364.7±4.2  | 0.18±0.04 | -22.7±1.1          |
|                  | 250               | 375.2±9.7  | 0.15±0.01 | -26.1±0.8          |
|                  | 500               | 393.6±10.5 | 0.18±0.01 | -26.0±1.6          |
| PLGA-miR-129+PEI | 125               | 435.3±11.4 | 0.22±0.03 | -24.8±1.2          |
|                  | 250               | 468.1±13.1 | 0.26±0.03 | -25.2±0.9          |
|                  | 500               | 471.4±15.0 | 0.29±0.04 | -26.6±1.4          |

**Fig S3.** Characterization of miR-129 nanoparticles obtained at different loading amounts of miR-129 (0.01-0.5µg per 1mg of NPs). **(a)** Representative average size based on the intensity (DLS) for the most promising miR-129-NPs formulations; **(b)** Summarized data obtained by DLS analysis from **(a)** (n=3).

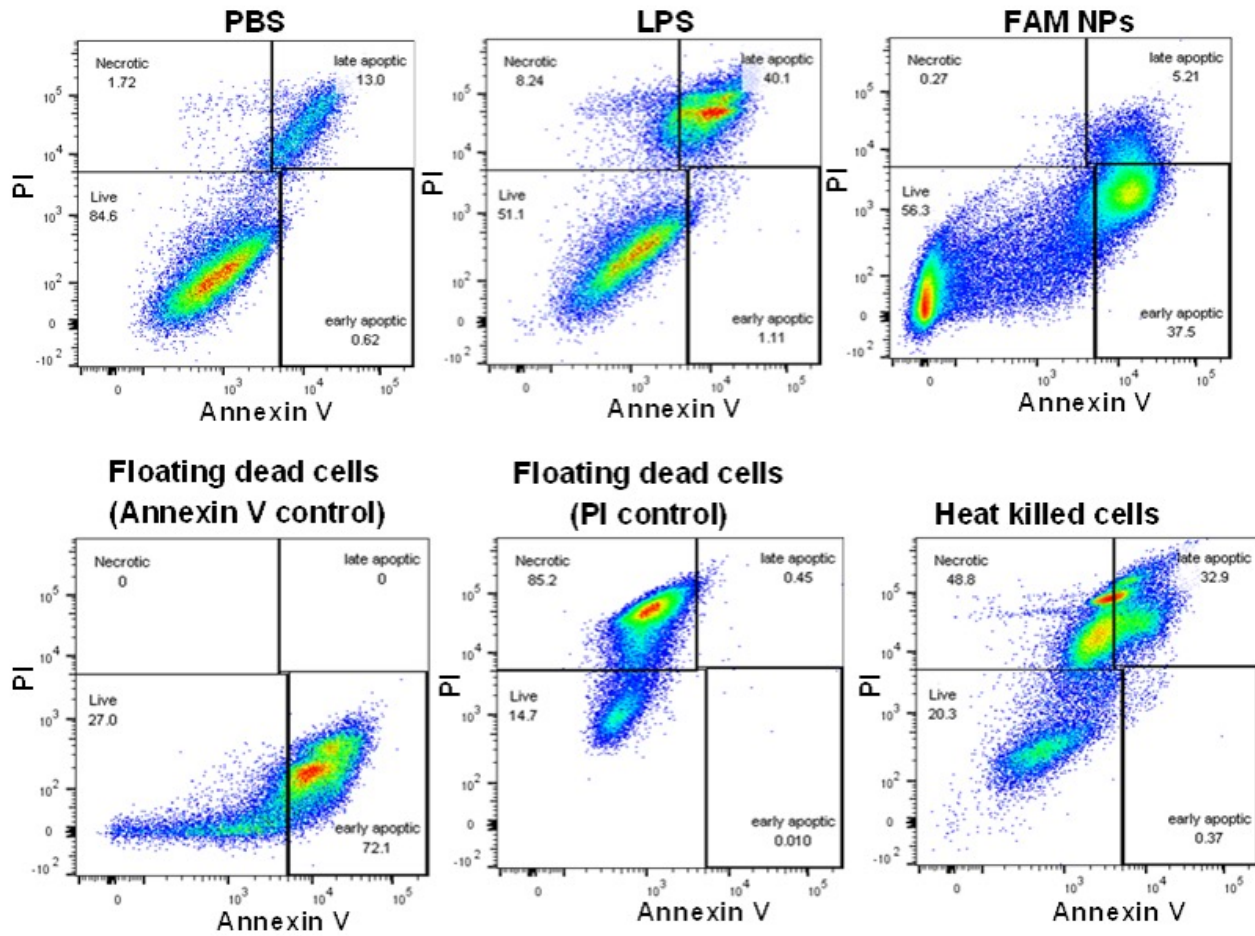

**Fig S4.** Flow cytometry data: controls for Annexin V/PI assay.



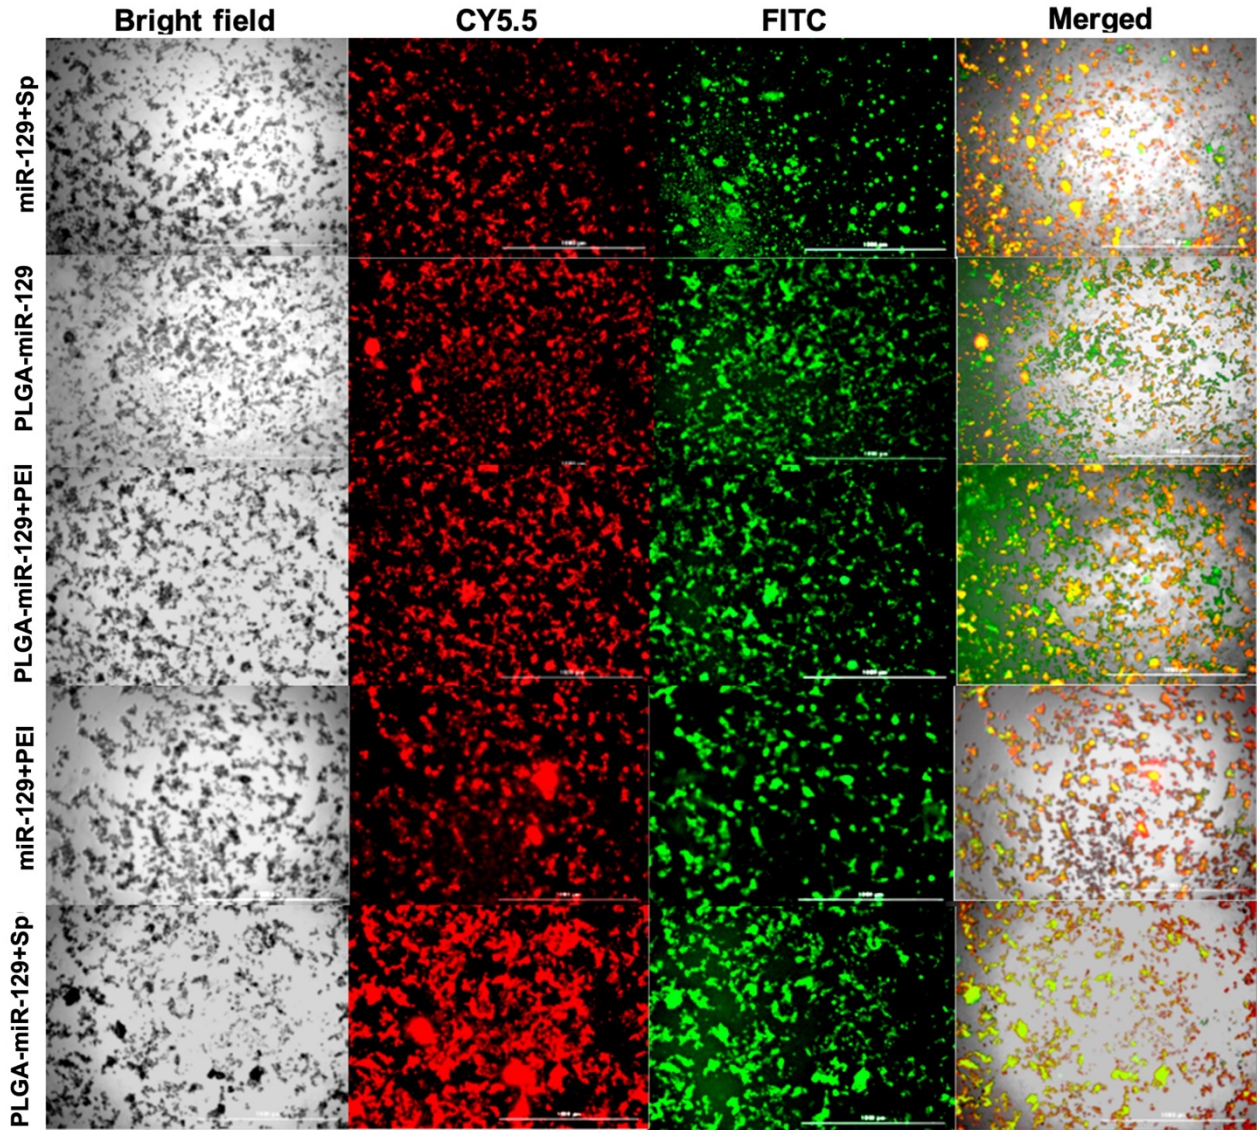

**Fig S5.** NPs uptake by BV-2 cells. BV-2 cells pretreated with LPS and then exposed to the NPs for 72h. Microphotographs of the cells were taken after 2x washes with PBS by Cytation 7 plate reader using bright field and filters for CY5.5 (for PLGA NPs) and FAM (for miR). Scale bar = 1 mm.

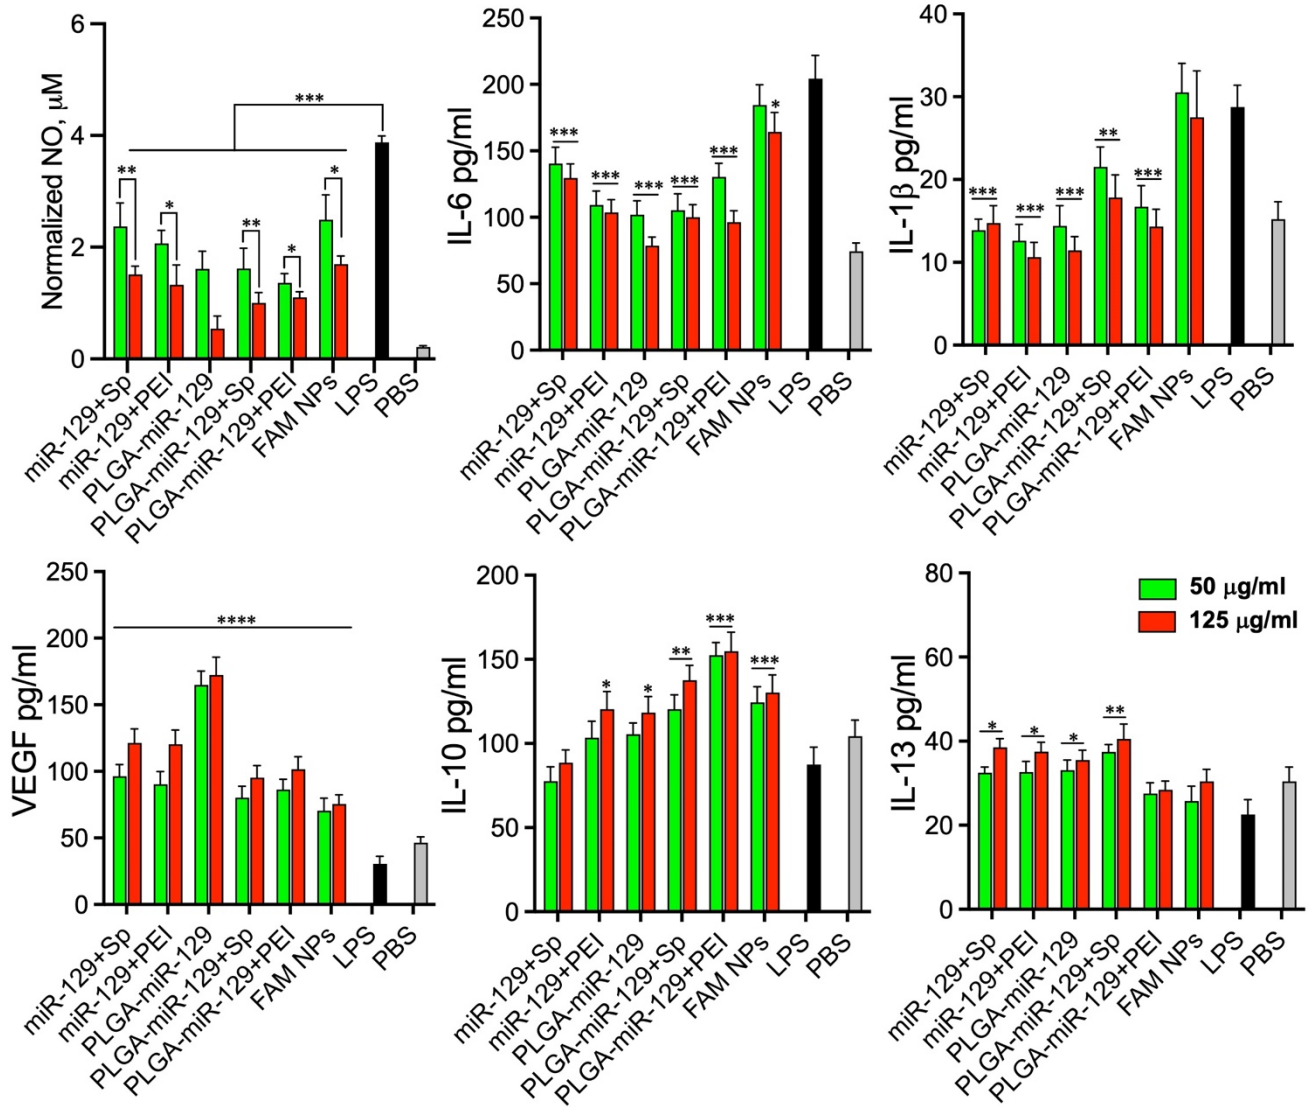

**Fig S6.** The immunomodulatory effects of miR-129 loaded nanoformulations were concentration-dependent. The expression levels of NO, and pro- and anti-inflammatory factors in response to nanoformulations were significantly altered compared to LPS group. N=5/group, error bars = SD, p-value: \*p < 0.05, \*\*p < 0.01, \*\*\*P < 0.001 and \*\*\*\*P < 0.0001 vs. LPS group.

| <b>NPs name</b>         | <b>Size<sub>zs</sub>, nm</b> | <b>Size<sub>SEM</sub>, nm</b> | <b>Pdl</b> | <b>Zeta potential, mV</b> |
|-------------------------|------------------------------|-------------------------------|------------|---------------------------|
| <b>FAM NPs</b>          | 330.5±8.4                    | 270.6±28.8                    | 0.27±0.00  | -22.2±1.4                 |
| <b>miR-129+EGCG</b>     | 356.4±9.2                    | 378.6±80.1                    | 0.46±0.02  | -28.5±0.4                 |
| <b>miR-129+Sp</b>       | 346.6±21.9                   | 367.4±31.2                    | 0.20±0.02  | -23.8±0.9                 |
| <b>miR-129+PEI</b>      | 321.8±30.5                   | 312.7±23.6                    | 0.23±0.01  | -27.1±0.5                 |
| <b>PLGA-miR-129</b>     | 310.8±6.9                    | 258.8±41.2                    | 0.16±0.01  | -26.5±2.8                 |
| <b>PLGA-miR-129+Sp</b>  | 407.9±17.9                   | 400.8±64.5                    | 0.48±0.18  | -21.7±0.6                 |
| <b>PLGA-miR-129+PEI</b> | 401.1±25.9                   | 327.2±71.3                    | 0.31±0.04  | -24.9±0.8                 |

**Table S1.** Physicochemical properties of each of the nanoformulations by ZetaSizer and SEM.
